# Supplementary material
Source: PubMed Central journal article supplement (PMC3127544)
Supplement: supp_mol.110.069542_Supplementary_Figure_1.pdf [file supp_mol.110.069542_Supplementary_Figure_1.pdf]

# Different residues in the GABA<sub>A</sub> receptor benzodiazepine binding pocket mediate benzodiazepine efficacy and binding

Elaine V. Morlock and Cynthia Czajkowski

Molecular Pharmacology

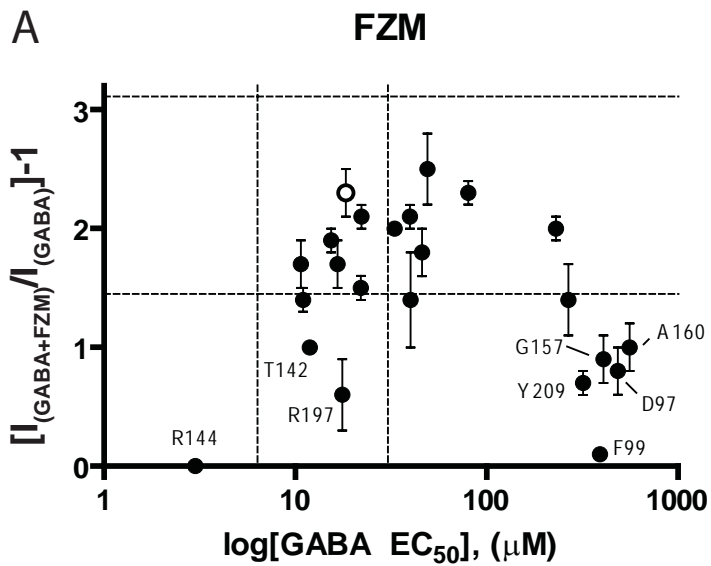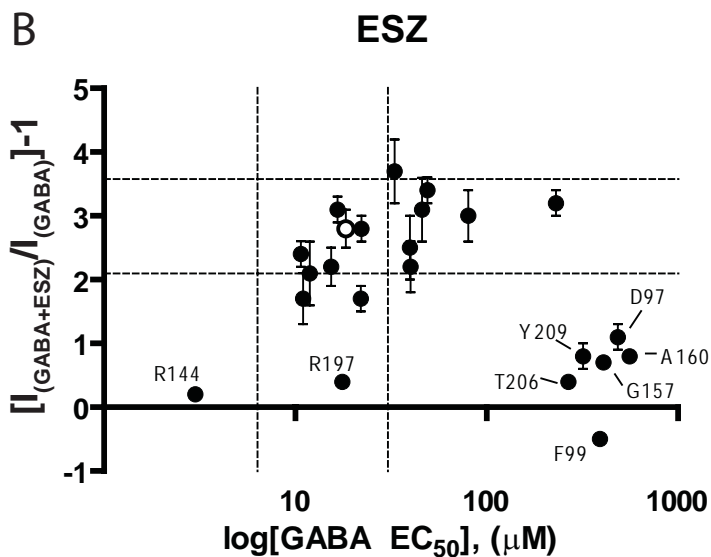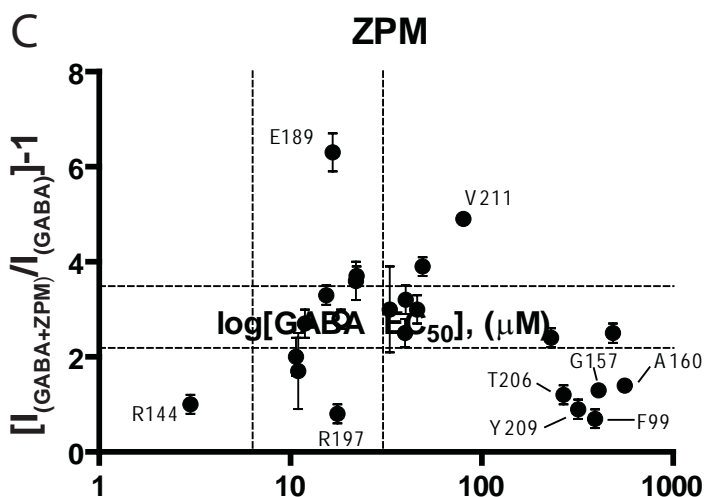

**Supplementary Figure 1.** GABA EC<sub>50</sub> is not correlated with BZD maximal potentiation. For WT and each mutant receptor, the maximal BZD potentiation of EC<sub>15</sub> GABA current is plotted versus log[GABA EC<sub>50</sub>] for A) FZM, B) ESZ and C) ZPM. Data are mean values. Error bars are SEM of BZD potentiation. Open circles represent WT values. Dashed lines represent 95% confidence intervals for WT GABA EC<sub>50</sub> (vertical lines) and BZD maximal potentiation (horizontal lines). Residues whose mutation significantly altered BZD potentiation compared to WT are labeled.
